# Supplementary material
Source: PubMed Central journal article supplement (PMC3901367)
Supplement: NIHMS535229-supplement-01.pdf [file NIHMS535229-supplement-01.pdf]

## **Supporting Information**

**Title:** Nanopore Detection of Copper Ions using a Polyhistidine Probe

**Author:** Guihua Wang, Liang Wang, Yujing Han, Shuo Zhou, and Xiyun Guan\*

**Author affiliation:**

Department of Biological and Chemical Sciences, Illinois Institute of Technology, 3101 S Dearborn St, Chicago, IL 60616, USA

**\*Corresponding author:**

Xiyun Guan  
Department of Biological and Chemical Sciences  
Illinois Institute of Technology  
3101 S Dearborn St, Chicago, IL 60616, USA  
Tel: 312-567-8922; Fax: 312-567-3494  
E-mail: xguan5@iit.edu

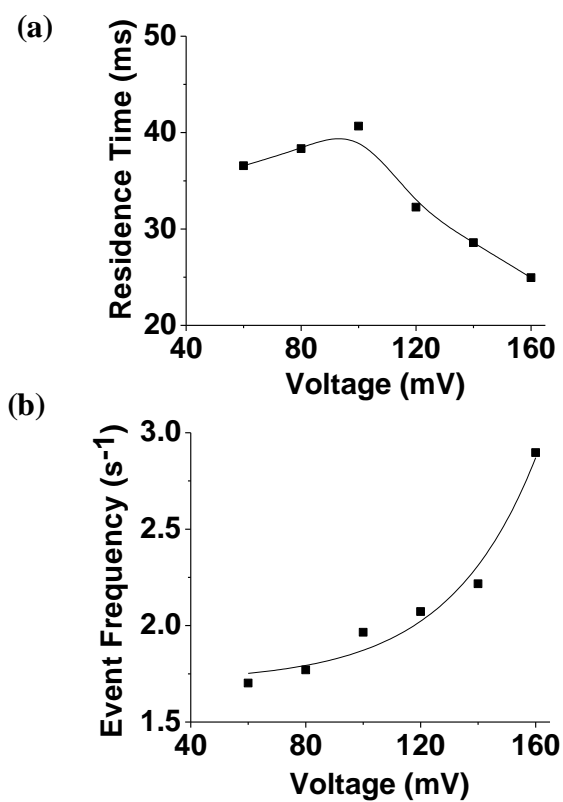

**Figure S1.** Effect of the applied voltage bias on the (a) mean residence time and (b) frequency of the long-lived events due to  $\text{Cu}^{2+}$ -peptide complexes. The experiments were performed in a buffer solution comprising 1.0 M NaCl and 10 mM Tris•HCl (pH 7.5) in the presence of 40  $\mu\text{M}$  peptide H10 and 15  $\mu\text{M}$   $\text{Cu}^{2+}$  ions.

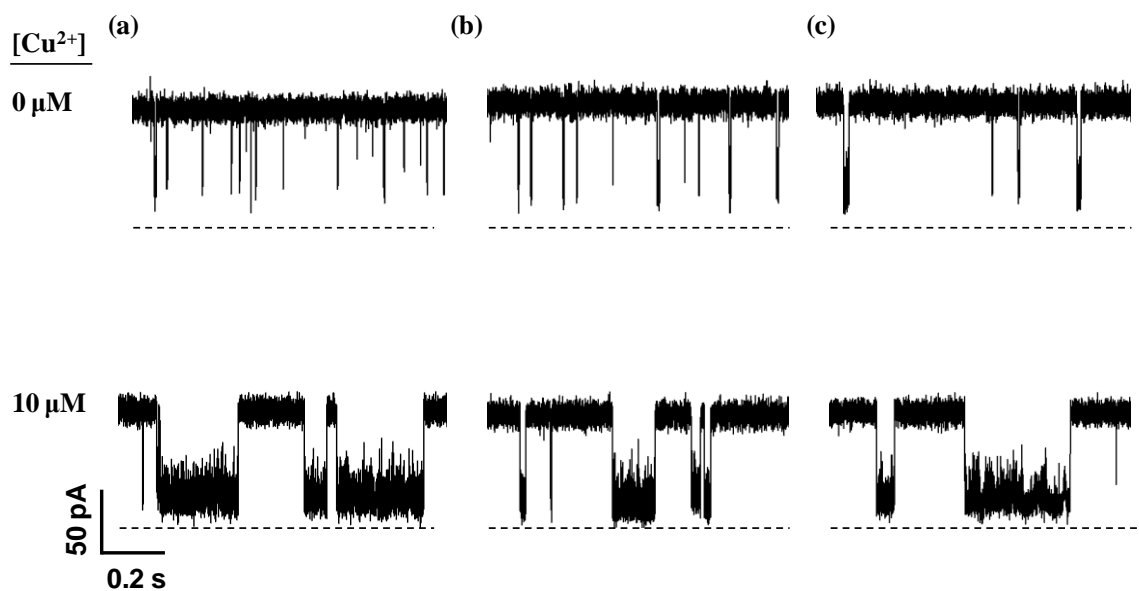

**Figure S2.** Typical single-channel current recording traces of peptide H10 in the absence and presence of  $\text{Cu}^{2+}$  ions at (a) pH 6.5, (b) pH 7.5, and (c) pH 8.5, showing the effect of pH on nanopore detection of  $\text{Cu}^{2+}$ . The experiments were performed with the (M113F)<sub>7</sub>  $\alpha$ -hemolysin pore in a buffer solution comprising 1.0 M NaCl and 10 mM Tris•HCl at +100 mV (*cis* at ground) in the presence of 40  $\mu\text{M}$  H10.

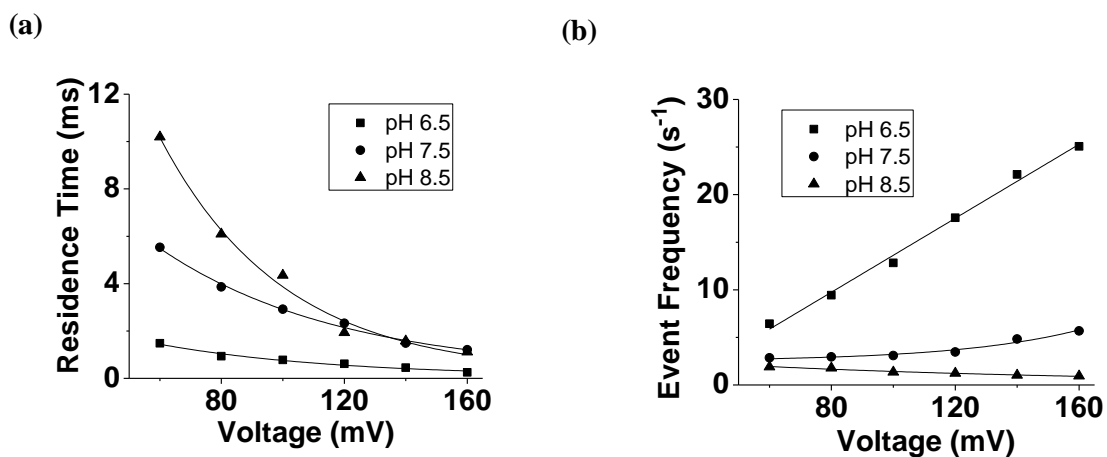

**Figure S3.** Effects of the applied voltage bias and solution pH on the short-lived events due to free peptides. (a) Residence time plot; and (b) event frequency plot. The experiments were performed in a buffer solution comprising 1.0 M NaCl and 10 mM Tris•HCl in the presence of 40  $\mu$ M peptide H10.

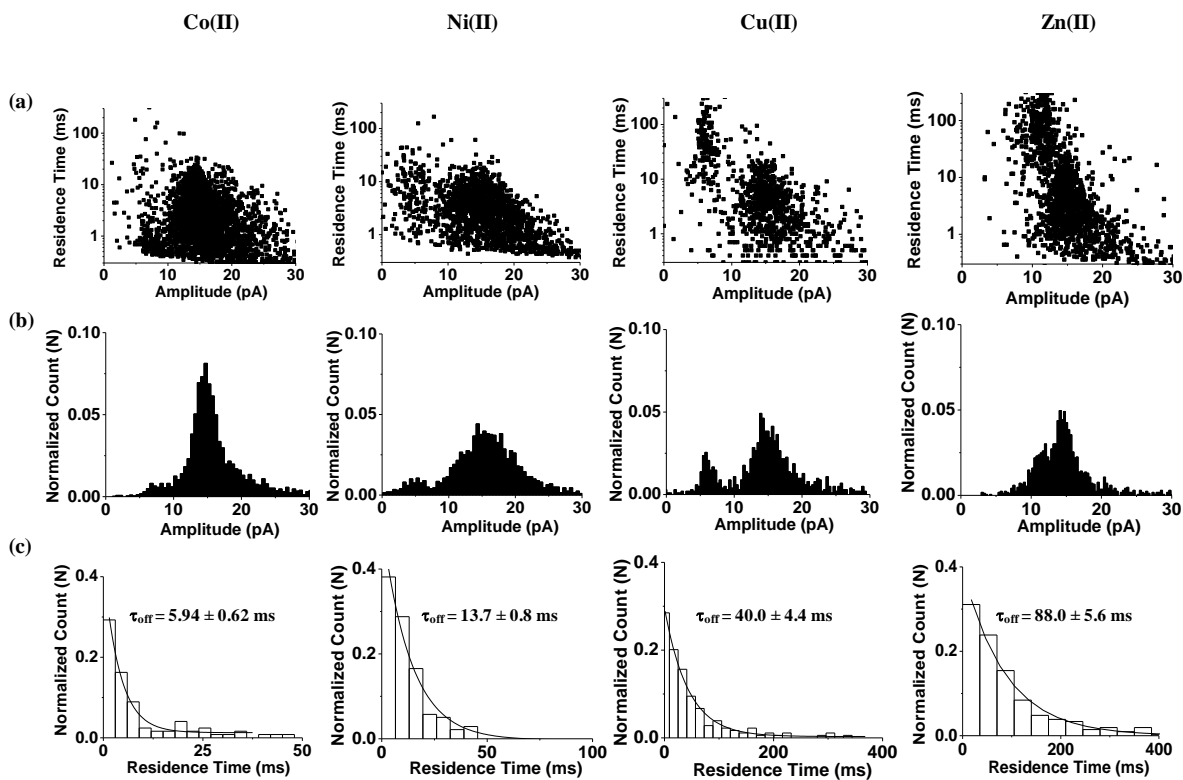

**Figure S4.** Event signatures of peptide H10 in the presence of various metal ions, demonstrating that  $\text{Cu}^{2+}$ -peptide complexes could be different from other metal ion-peptide complexes based on event residence times and/or blockage amplitudes. The experiments were performed with the  $(\text{M113F})_7$   $\alpha$ -hemolysin pore at +100 mV in the presence of 40  $\mu\text{M}$  H10 and 10  $\mu\text{M}$  metal ions.

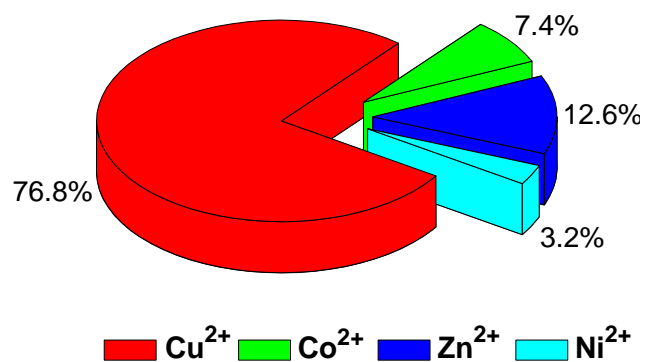

**Figure S5.** Pie chart showing the contribution from various metal ion-peptide complexes to the current modulation events observed in the nanopore. The experiments were performed with the (M113F)<sub>7</sub>  $\alpha$ -hemolysin pore at +100 mV in the presence of 40  $\mu\text{M}$  H10 and 10  $\mu\text{M}$  metal ions. Only the events having the residence times larger than 15 ms, and with residual currents within the range from 4 pA to 10 pA were included in the data analysis.

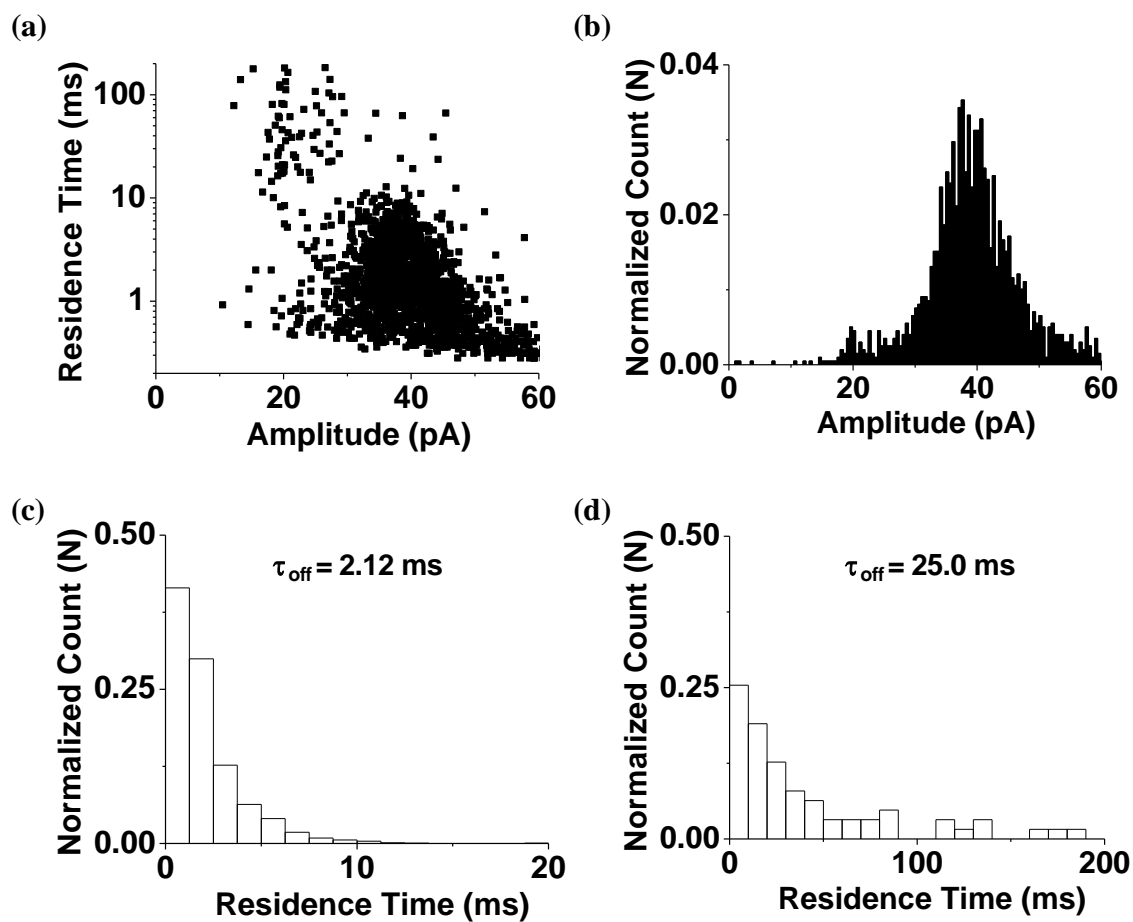

**Figure S6.** Event signatures of peptide H10 in the presence of  $\text{Cu}^{2+}$  ions. (a) Scatter plot of event residence time versus amplitude; (b) amplitude histogram; (c) residence time histogram of the short-lived events due to free peptides; and (d) residence time histogram of the long-lived events due to  $\text{Cu}^{2+}$ -peptide complexes. The experiments were performed with the  $(\text{M113F})_7$   $\alpha$ -hemolysin pore in a buffer solution comprising 1.0 M NaCl and 10 mM Tris•HCl (pH 7.5) at +160 mV (*cis* at ground). The concentrations of peptide H10 and  $\text{Cu}^{2+}$  ions were 40  $\mu\text{M}$ , and 200 nM, respectively.

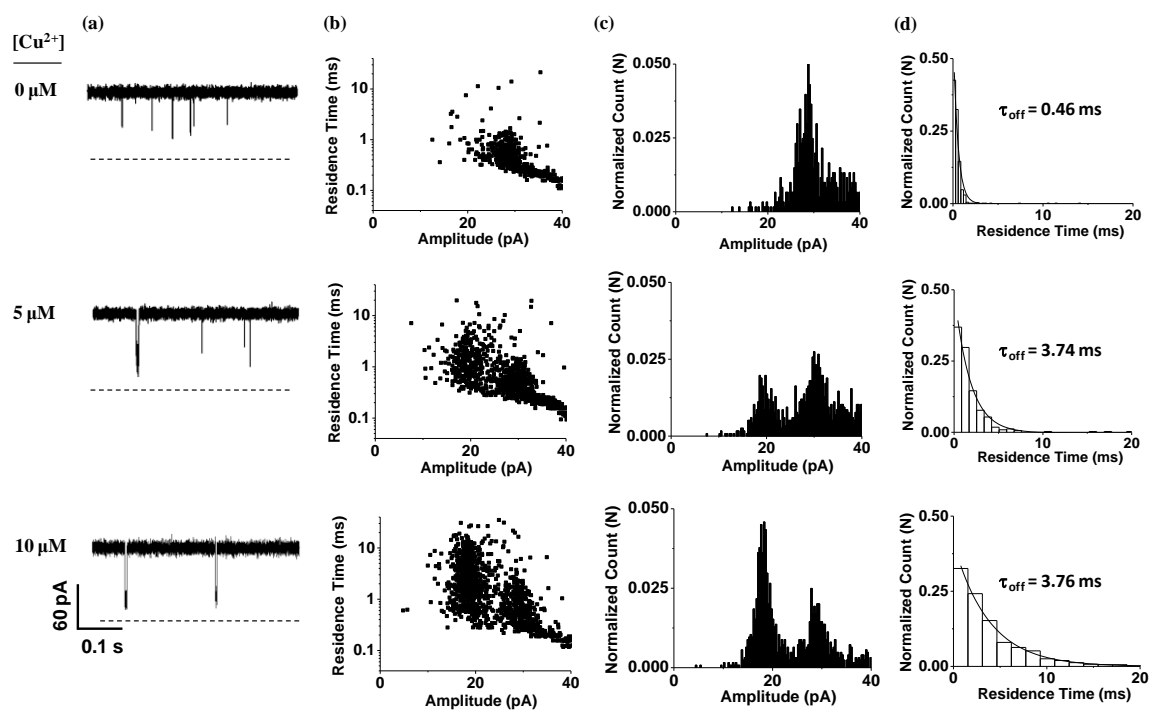

**Figure S7.** Detection of  $\text{Cu}^{2+}$  ions using a wide-type  $\alpha$ -hemolysin pore. (a) Typical trace segments; (b) scatter plots of event residence time versus amplitude; (c) amplitude histograms; and (d) residence time histograms (note that only the long-lived events were included in the data analysis at 5  $\mu\text{M}$  and 10  $\mu\text{M}$  concentrations of  $\text{Cu}^{2+}$  ions). The experiments were performed at +100 mV in the presence of 40  $\mu\text{M}$  H10.
